# Supplementary figures and images for: SERPINE1 Overexpression Promotes Malignant Progression and Poor Prognosis of Gastric Cancer
Source: Hindawi journal article supplement (doi:10.1155/2022/2647825), 2022-01-29

Nucleus

Microtubules

SERPINE1

Merge

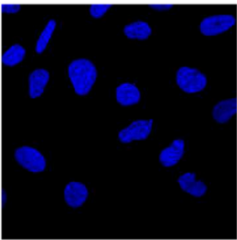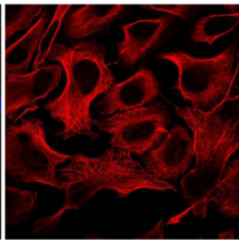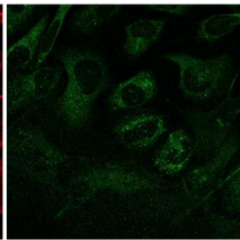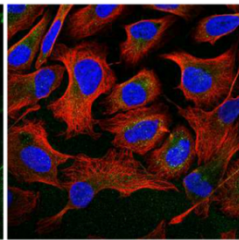

U-2 OS

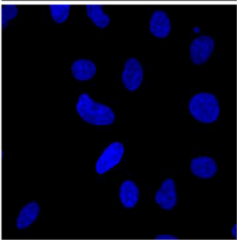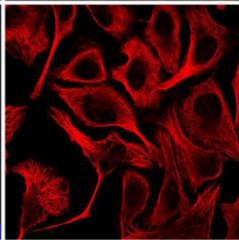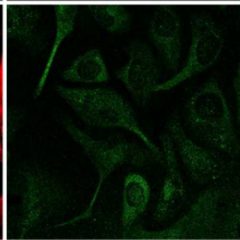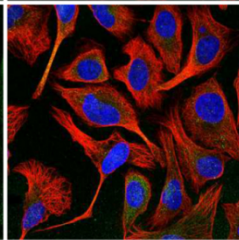

U-2 OS

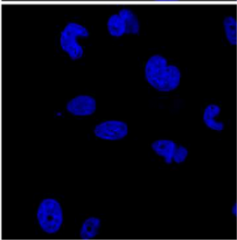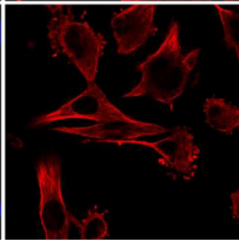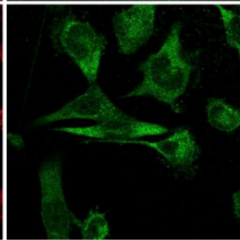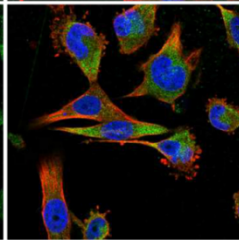

U-251 MG

Supplement: f1 [file 2647825.f1.zip]

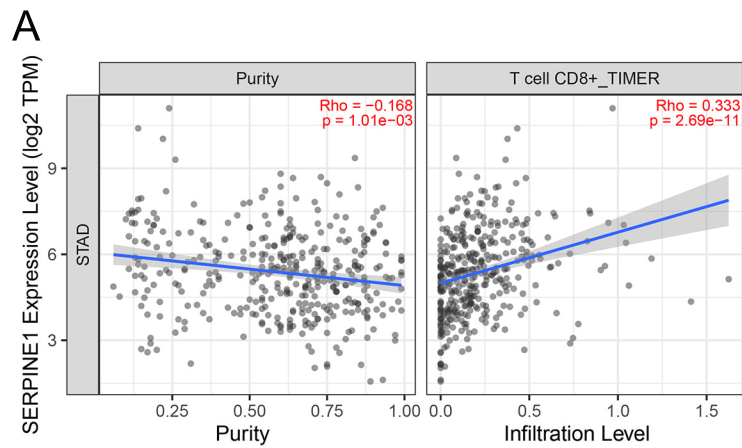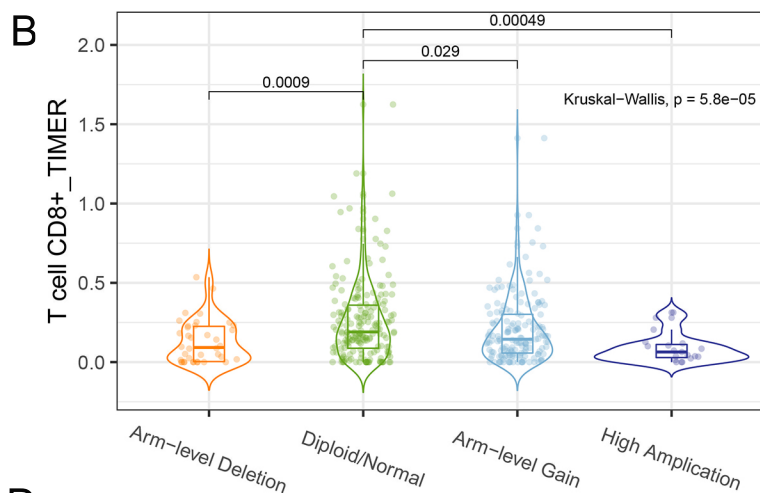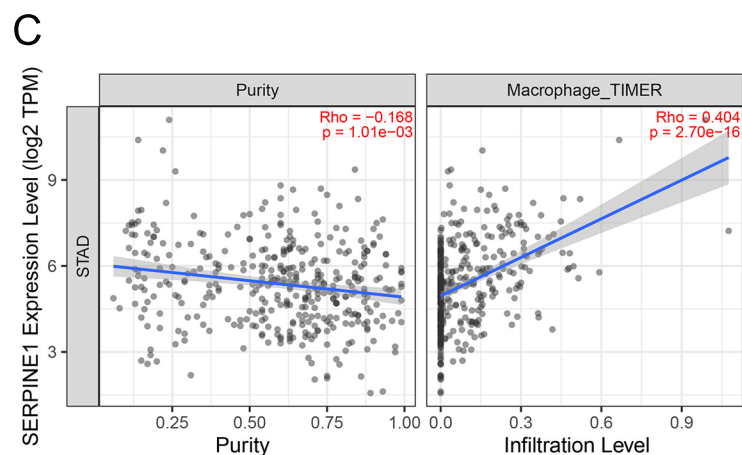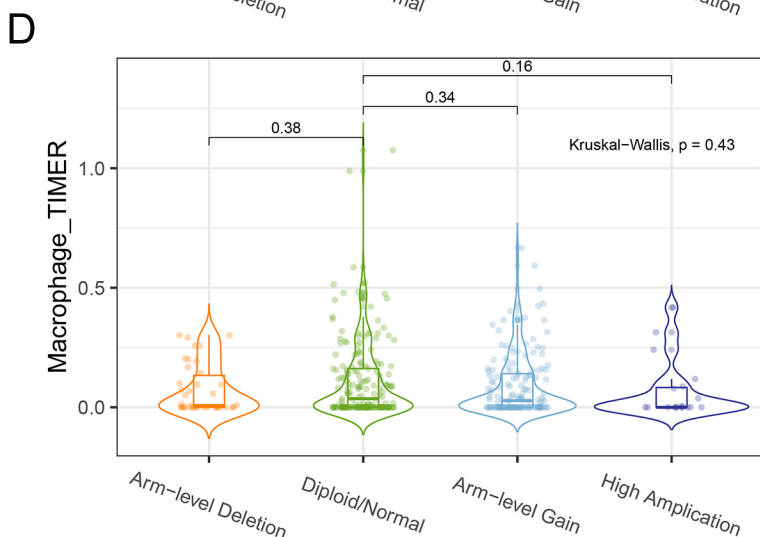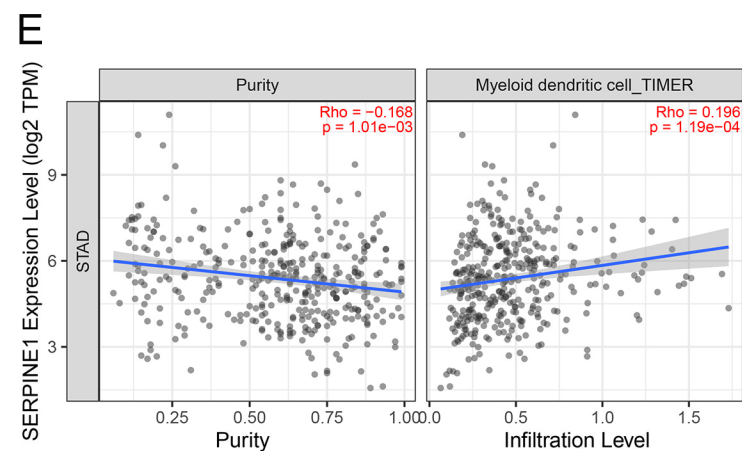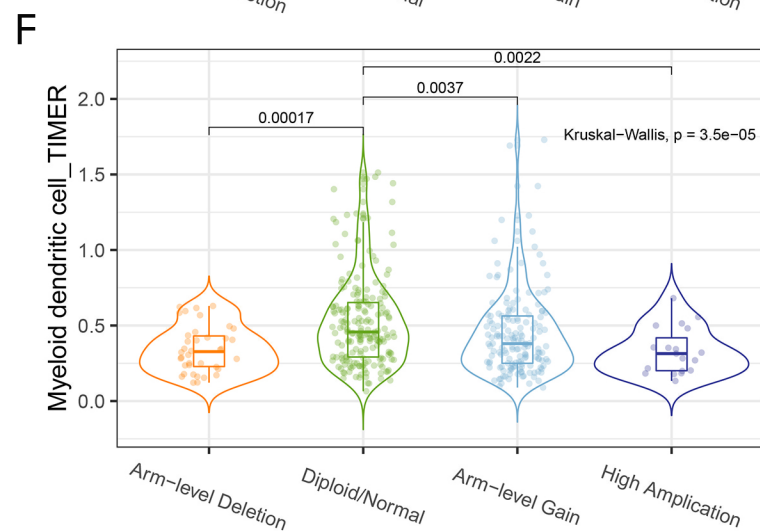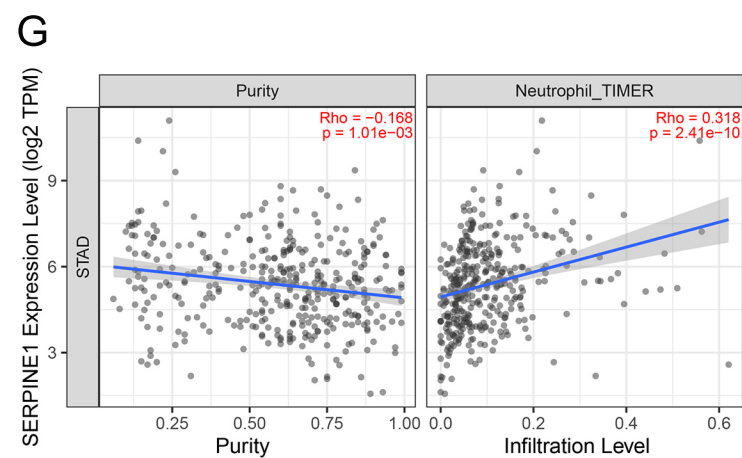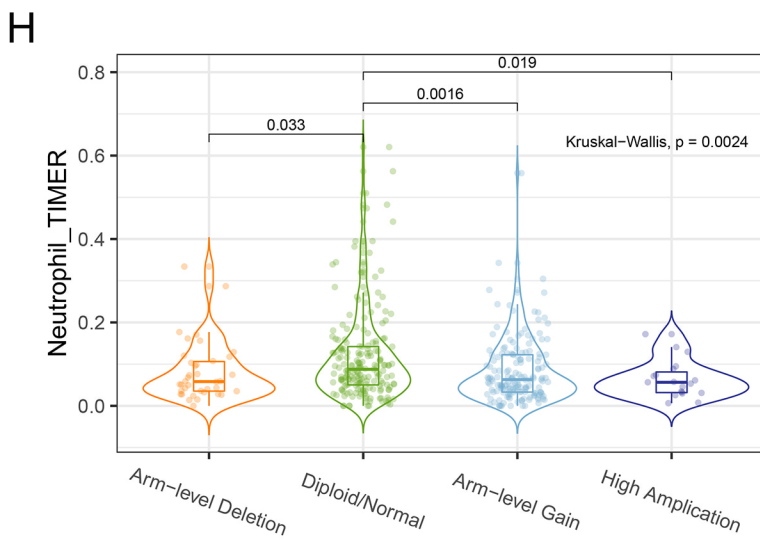

Supplement: f1 [file 2647825.f1.zip]
